# Supplementary material for: Enhanced selective CO2 adsorption on polyamine/MIL-101(Cr) composites
Source: Royal Society of Chemistry journal article supplement (doi:10.1039/c4ta01174k), 2014-01-01
Supplement: c4ta01174k1.pdf [file c4ta01174k1.pdf]

## Supporting Information

### Enhanced selective CO<sub>2</sub> adsorption on polyamine/MIL-101(Cr) composites

Yichao Lin,<sup>[a]</sup> Hao Lin,<sup>[a,b]</sup> Haimin Wang,<sup>[b]</sup> Yange Suo<sup>[a]</sup>, Baihai Li,<sup>[a]</sup> Chunlong Kong\*<sup>[a]</sup>  
and Liang Chen\*<sup>[a]</sup>

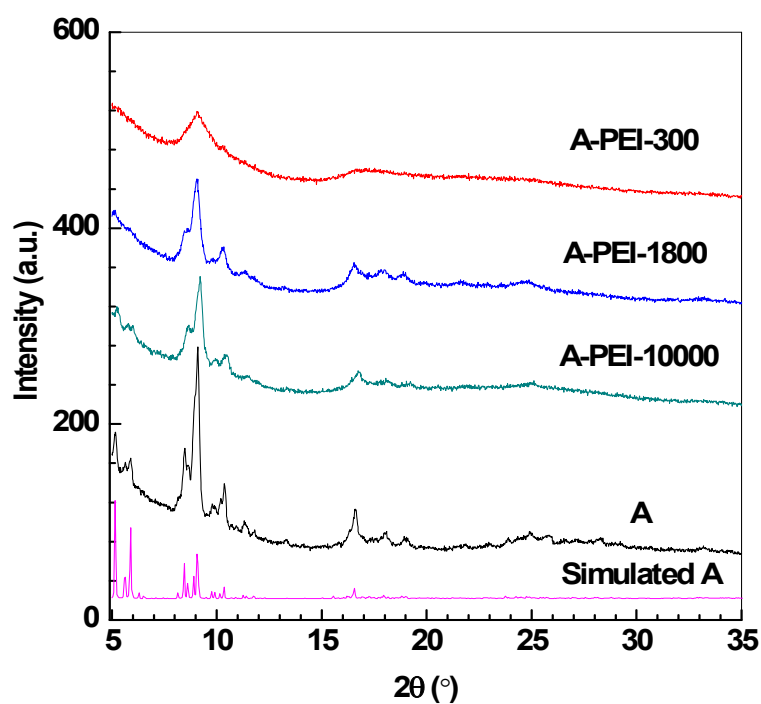

**Figure S1.** Powder XRD patterns of A before and after loading PEI, and simulated XRD patterns of A.

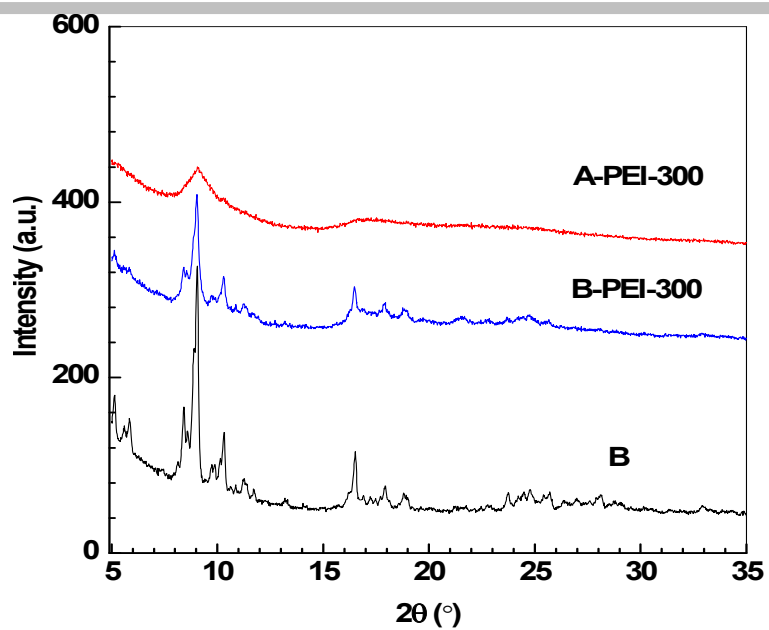

**Figure S2.** Powder XRD patterns of sample B before and after loading PEI, and XRD patterns of A-PEI-300.

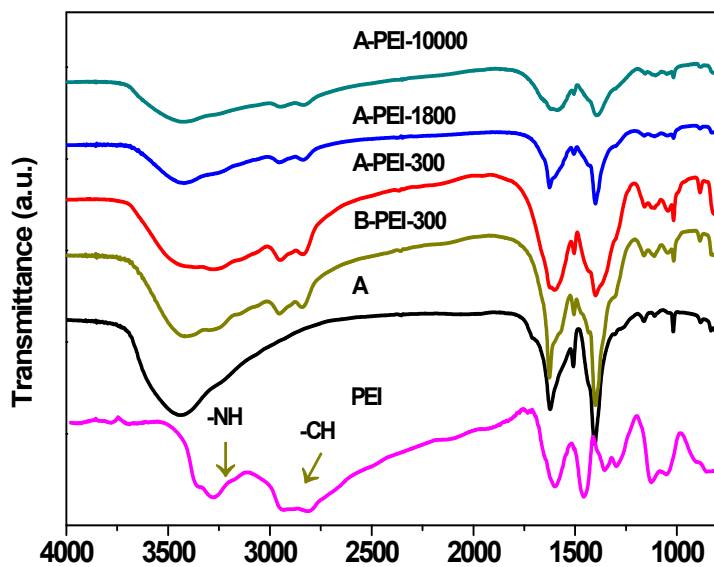

**Figure S3.** IR spectra of PEI, A, A-PEI-300, A-PEI-1800, B-PEI-10000 and B-PEI-300.

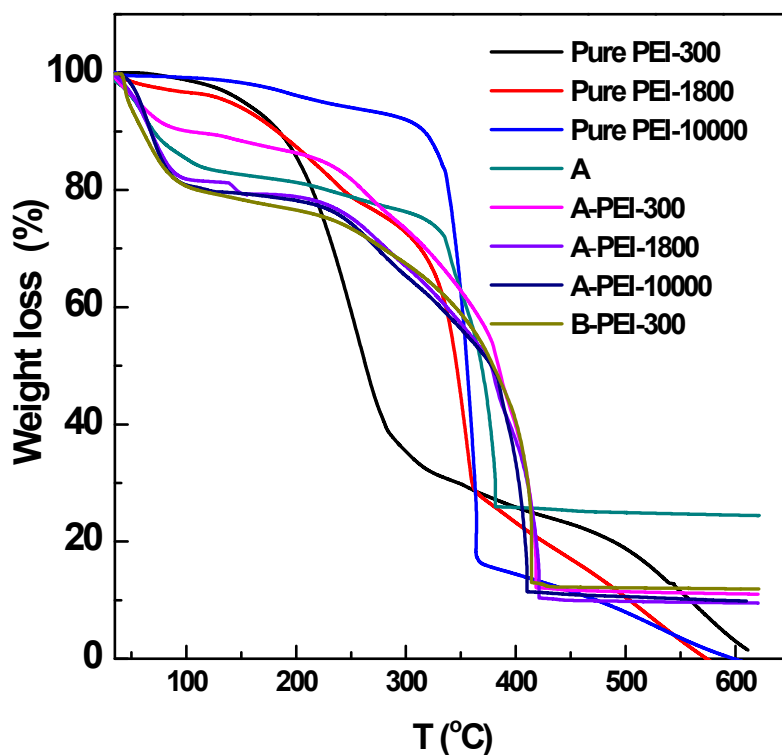

**Figure S4.** Weight loss curves of the pure PEI and MIL-101(Cr) before and after loading PEI.

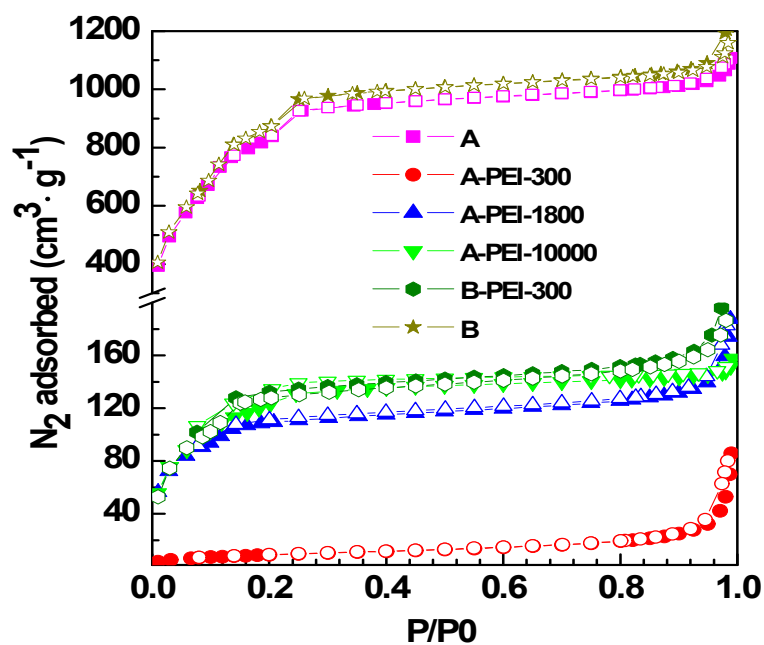

**Figure S5.** N<sub>2</sub> adsorption/desorption isotherms at 77 K. The symbols: Filled, adsorption; Blank, desorption.

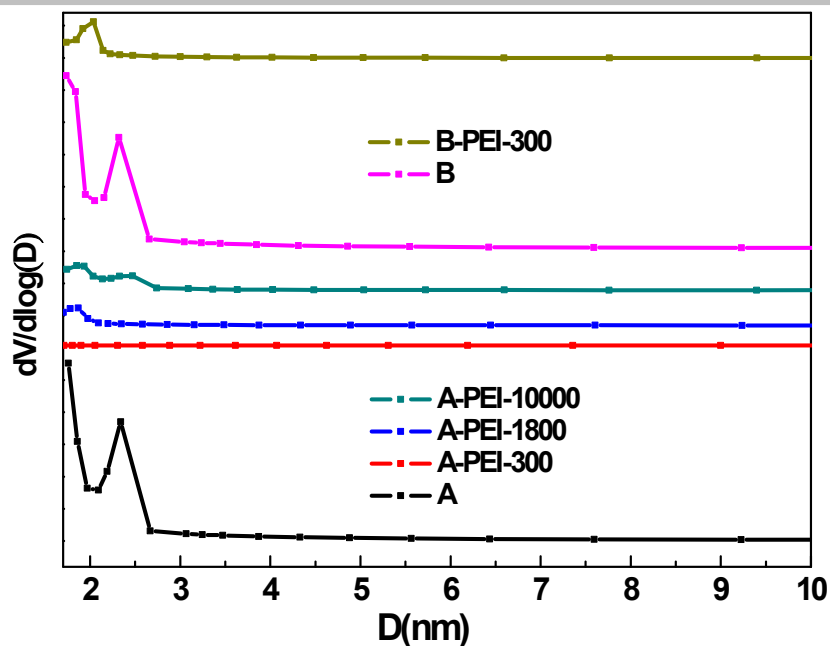

**Figure S6.** Pore size distribution of the samples A and B before and after loading PEI.

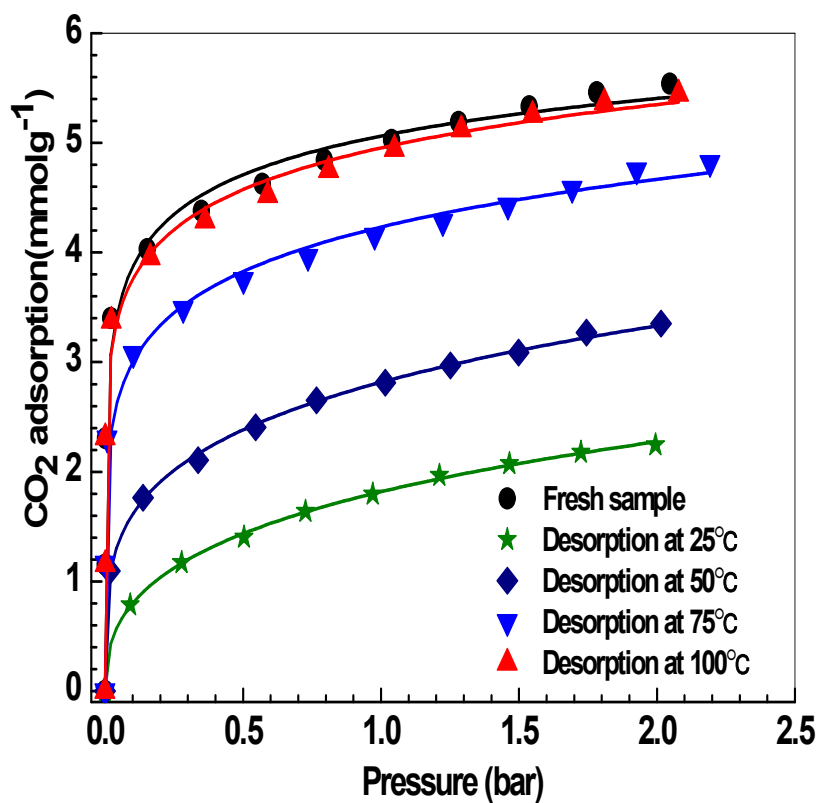

**Figure S7.**  $\text{CO}_2$  adsorption isotherms for B-PEI-300 after  $\text{CO}_2$  desorbed at different temperature under vacuum for 1 hour.

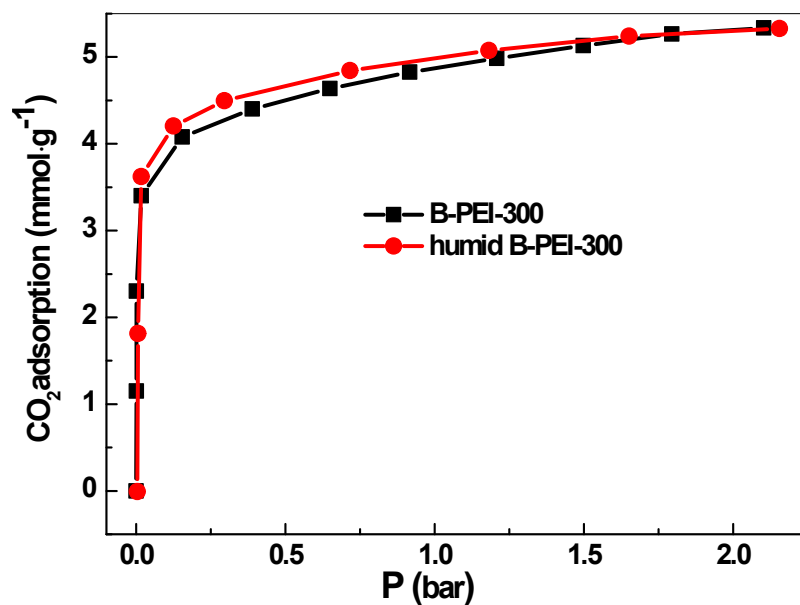

**Figure S8.** CO<sub>2</sub> adsorption properties of B-PEI-300 and B-PEI-300 exposed in the moisture for 2 hours, respectively.

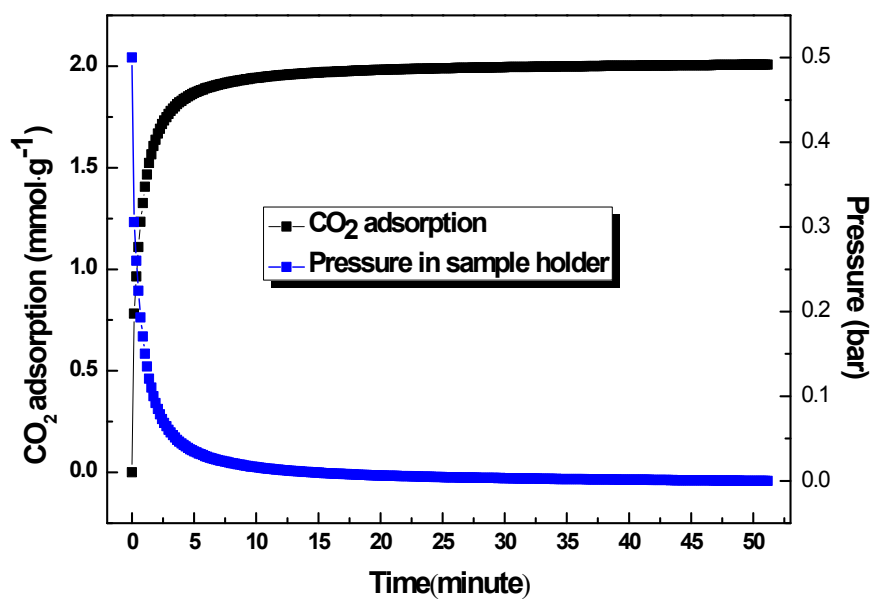

**Figure S9.** CO<sub>2</sub> adsorption kinetics of A-PEI-300 at 25 °C.

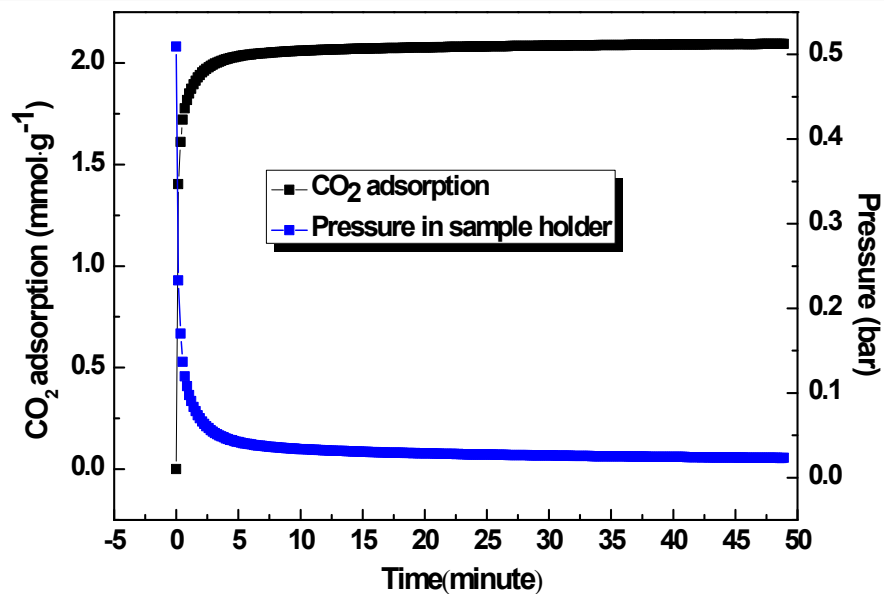

**Figure S10.** CO<sub>2</sub> adsorption kinetics of A-PEI-300 at 50 °C.

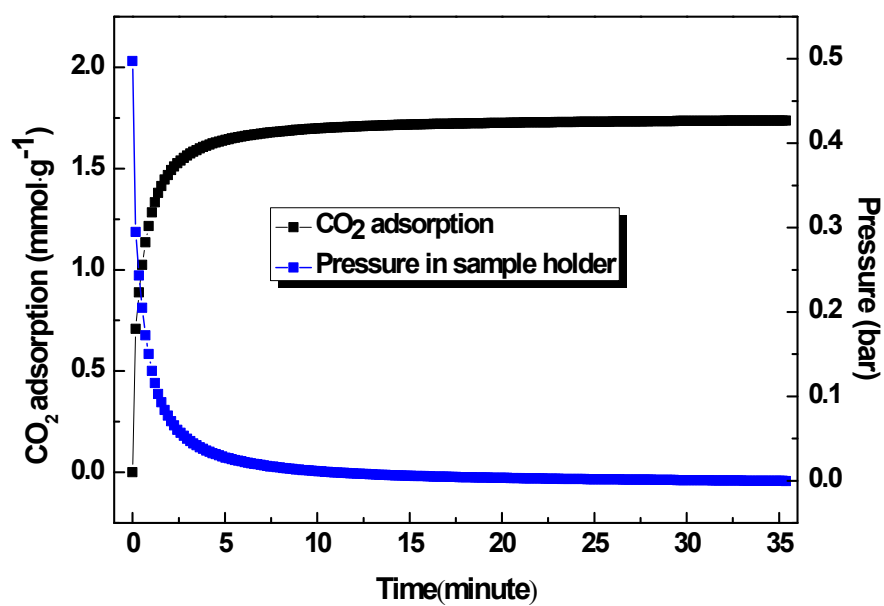

**Figure S11.** CO<sub>2</sub> adsorption kinetics of A-PEI-1800 at 25 °C.

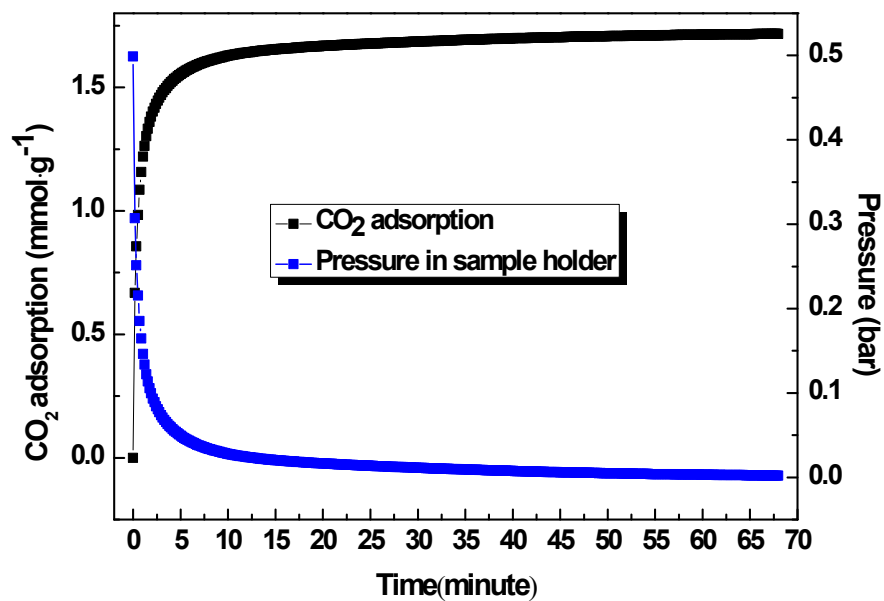

Figure S12. CO<sub>2</sub> adsorption kinetics of A-PEI-1800 at 50 °C.

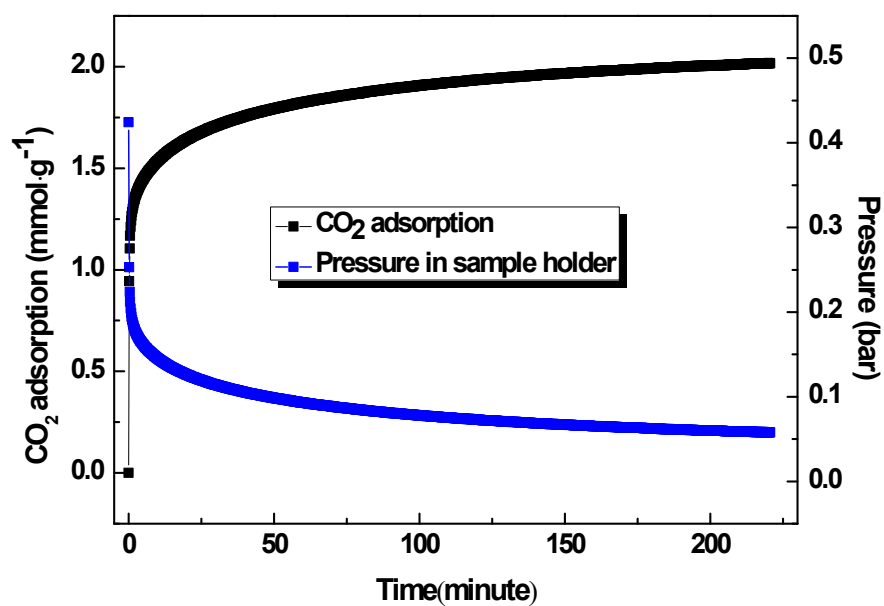

Figure S13. CO<sub>2</sub> adsorption kinetics of A-PEI-10000 at 25 °C.

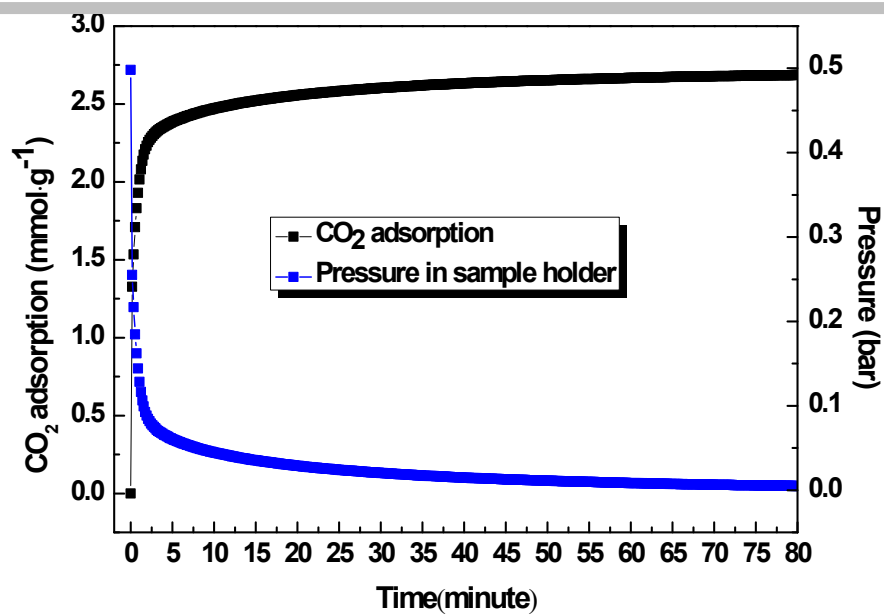

Figure S14. CO<sub>2</sub> adsorption kinetics of A-PEI-10000 at 50 °C.

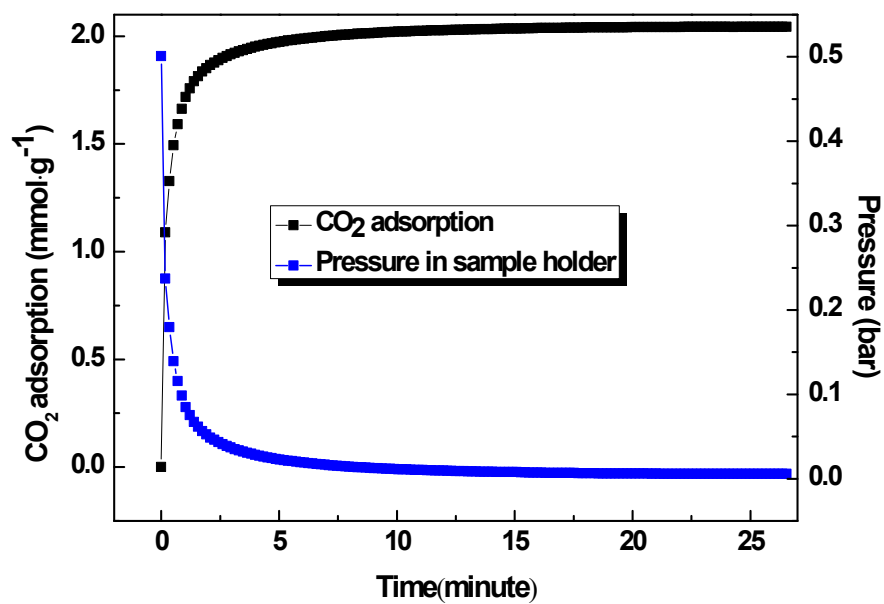

Figure S15. CO<sub>2</sub> adsorption kinetics of B-PEI-300 at 25 °C.



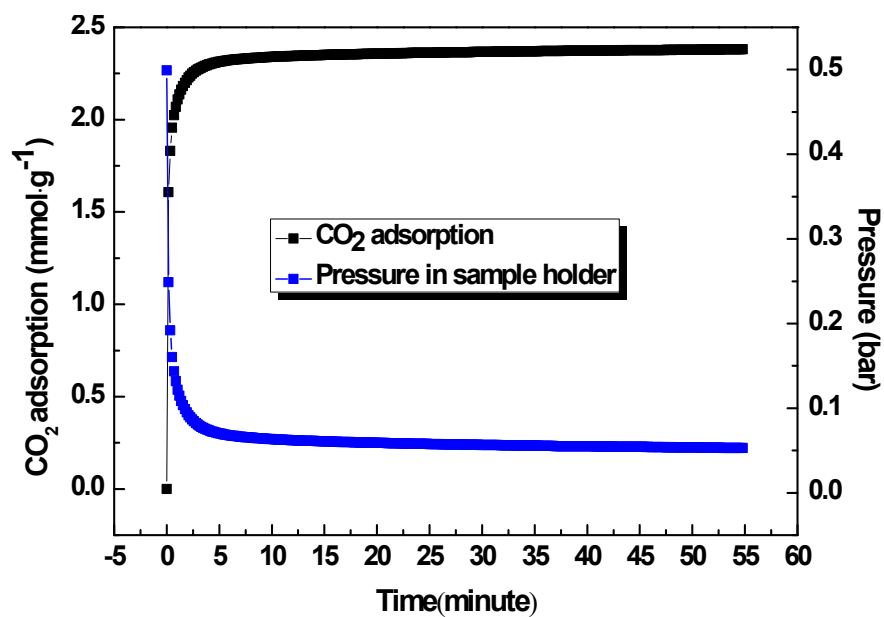

**Figure S16.** CO<sub>2</sub> adsorption kinetics of B-PEI-300 at 50 °C.

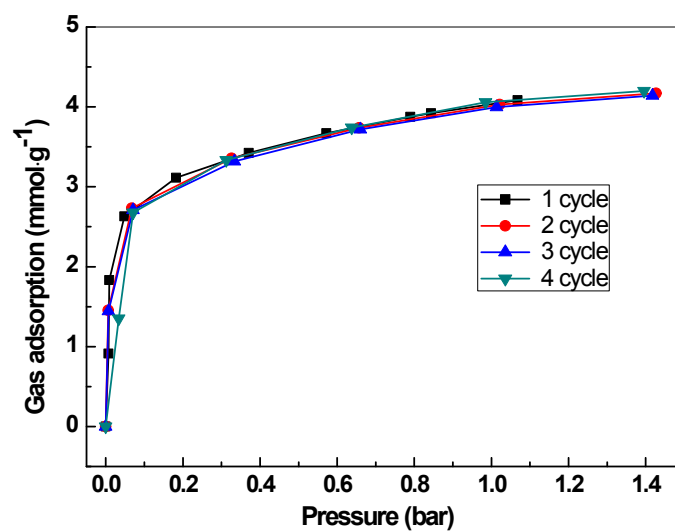

**Figure S17.** Cyclic measurements for A-PEI-300 at 25 °C. Between each measurement, the sample was evacuated for 2 hours at 110 °C.

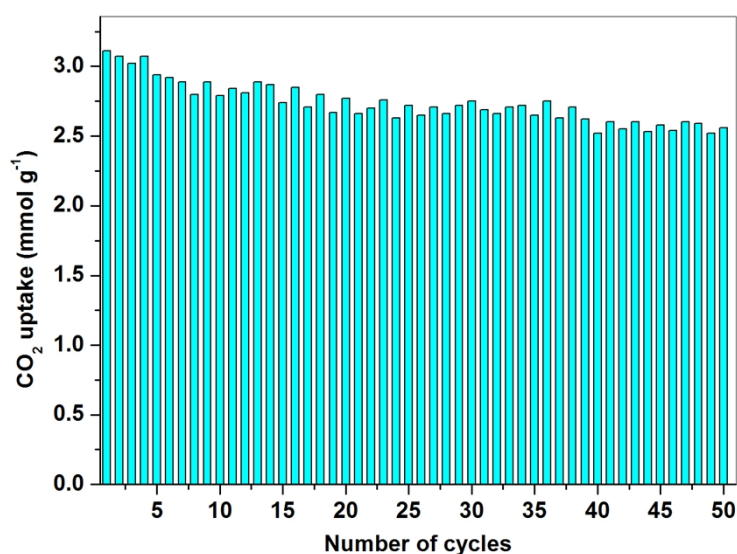

Figure S18. The cyclic CO<sub>2</sub> uptake of PEI-MIL-101-300 at 25 °C and 0.15 bar.

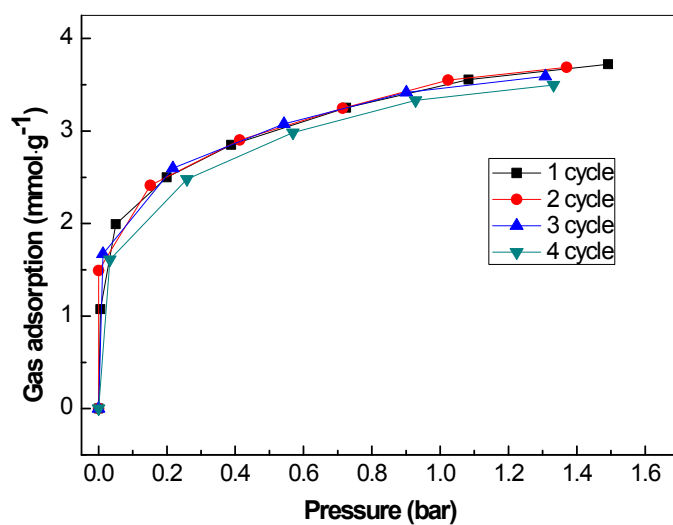

**Figure S19.** Cyclic measurements for A-PEI-1800 at 25 °C. Between each measurement, the sample was evacuated for 2 hours at 110 °C.

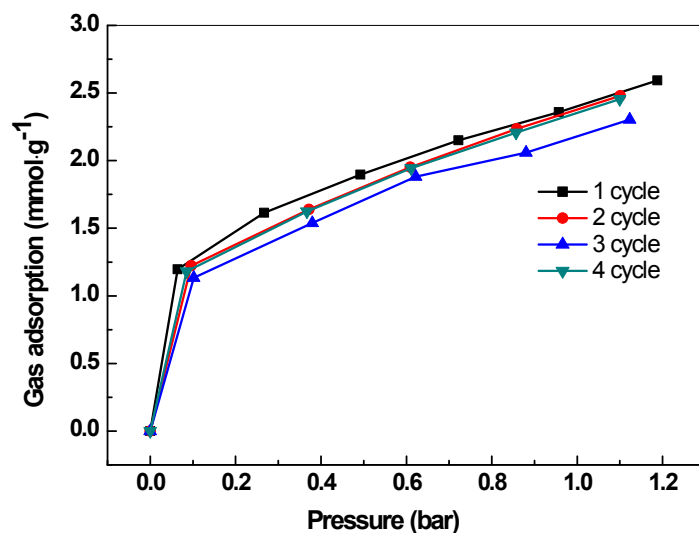

**Figure S20.** Cyclic measurements for A-PEI-10000 at 25 °C. Between each measurement, the sample was evacuated for 2 hours at 110 °C.

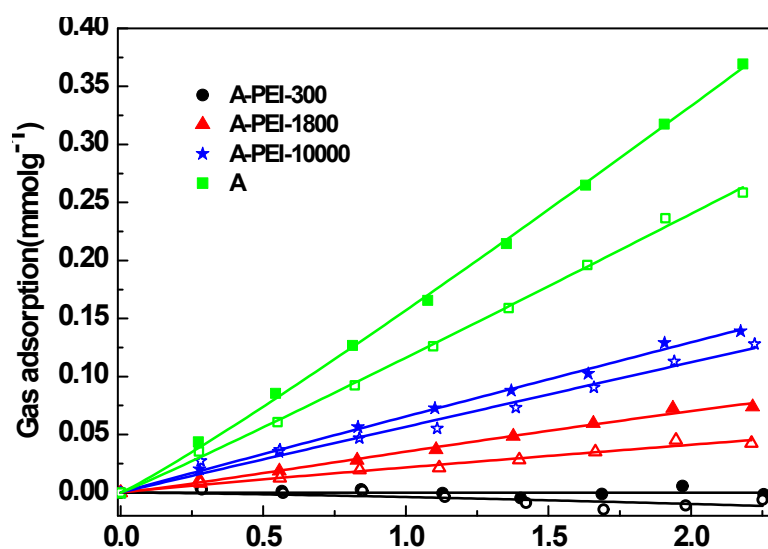

**Figure S21.** N<sub>2</sub> adsorption isotherms of the sample A before and after loading PEI. Symbols: Filled, 25 °C; Hollow, 50 °C.

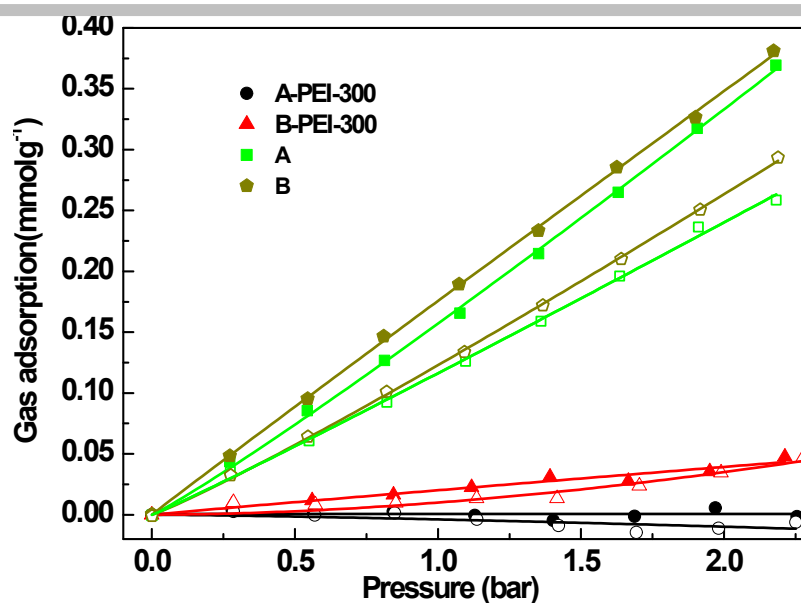

**Figure S22.** N<sub>2</sub> adsorption isotherms of the samples A and B before and after loading PEI. Symbols: Filled, 25°C; Hollow, 50°C.

**Table S1** amine efficiency of PEI loaded samples

|             | mmol CO <sub>2</sub> / mmol N at 0.15<br>bar |       |
|-------------|----------------------------------------------|-------|
|             | 25 °C                                        | 50 °C |
|             | A-PEI-300                                    | 0.77  |
| A-PEI-1800  | 0.58                                         | 0.51  |
| A-PEI-10000 | 0.30                                         | 0.48  |
| B-PEI-300   | 0.88                                         | 0.65  |

### Isosteric heat calculation

The isosteric heat of CO<sub>2</sub> adsorption values were calculated using the Clausius-Clapeyron equation:

$$\frac{d \ln P}{d(1/T)} = -\frac{Q_{st}}{R}, \quad \ln P = -\frac{Q_{st}}{R} \frac{1}{T} + \text{const}$$

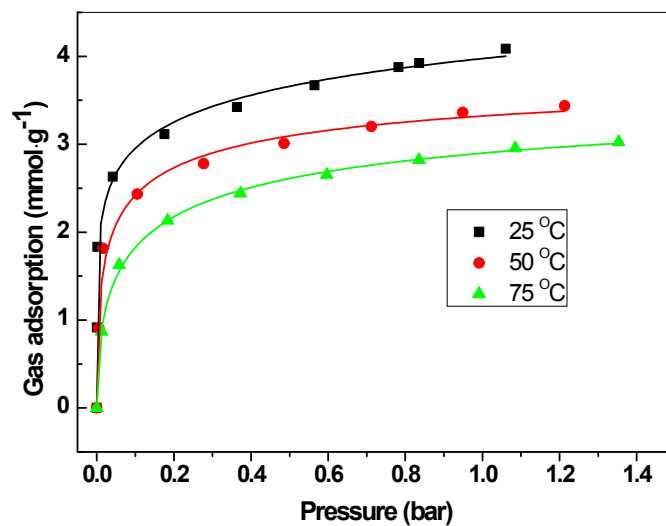

**Figure S23.** The CO<sub>2</sub> adsorption isotherms of A-PEI-300 at 25-75 °C

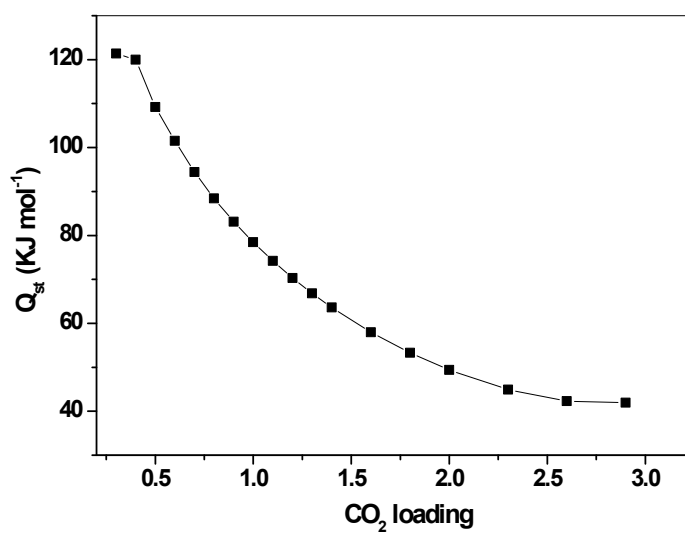

**Figure S24** The isosteric heat of the CO<sub>2</sub> adsorption calculated from the adsorption isotherms measured from 25 °C to 75 °C using Clausius-Clapeyron equation.
